# Supplementary material for: Updated Multimodality Evidence on Right Ventricular Dysfunction and Pulmonary Hypertension in HFpEF: A Systematic Review and Meta-analysis
Source: Research Square preprint supplement (doi:10.21203/rs.3.rs-8821352/v1), 2026-02-23
Supplement: Supplementary file 1 [file b9552c282c020f2c7286e987.docx]

**Supplementary web appendix for**

**Updated Multimodality Evidence on Right Ventricular Dysfunction and Pulmonary Hypertension in HFpEF: A Systematic Review and Meta-analysis**

**[Table S1. Search strategy. 1](#_Toc8203)**

**[Table S2. AHRQ quality assessment criteria. 2](#_Toc17797)**

**[Table S3. Characteristics of individual studies. 3](#_Toc13928)**

**[Table S4. Characteristics of individual studies included in group comparison analyses. 12](#_Toc18042)**

**[Table S5. Egger’s Test for prevalence of RVD and PH Publication bias 13](#_Toc6660)**

**[Table S6. Leave-one-out sensitivity analysis for meta-analysis of prevalence of RVD and PH with fewer than 10 studies 13](#_Toc20563)**

**[References 15](#_Toc9746)**

**[Supplementary Figure Legends 21](#_Toc22659)**

**Abbreviation:**

HF, heart failure; PH, pulmonary hypertension ; HFpEF, heart failure with preserved ejection fraction ; RVD, right ventricular dysfunction; PH, pulmonary hypertension; LVEF, left ventricular ejection fraction; LVFP, left ventricular filling pressure; PCWP, pulmonary papillary wedge pressure; BNP, b-type brain-type natriuretic peptide; RAP, right atrial pressure; FAC, fractional area change; TAPSE, tricuspid annular plane systolic excursion; RVS', right ventricular systolic velocity; GLS, global longitudinal strain; TR, tricuspid regurgitation; Tei, myocardial performance index; RVEF, right ventricular ejection fraction; PAMP, pulmonary arterial mean pressure; PASP, pulmonary arterial systolic pressure; IVC, Inferior Vena Cava; RVEDD, right ventricular end-diastolic diameter; FWLS, free wall longitudinal strain; NS, not state.

**Table S1. Search strategy.**

| **Search strategy in PubMed** | | | | |
| --- | --- | --- | --- | --- |
| #1 | | | ((preserved ejection fraction ) AND ("Heart Failure"[Mesh] or Cardia Failure or Heart Decompensation or Decompensation heart or myocardial failure or HF)) | 12,459 |
| #2 | | | (("Ventricular Dysfunction, Right"[Mesh] or Right Ventricular Dysfunction or Dysfunction, Right Ventricular or Dysfunctions, Right Ventricular or Right Ventricular Dysfunctions or Ventricular Dysfunctions, Right) OR ("Hypertension, Pulmonary"[Mesh] or Pulmonary Hypertension or PH)) | 14,722,761 |
| #3 | | | #1 AND #2 | 7,113 |
| **Search strategy in Embase** | | | | |
| #1 | 'preserved ejection fraction'/exp OR 'preserved ejection fraction' OR 'preserved AND ejection AND fraction' | | 23,976 | |
| #2 | 'heart failure'/exp OR 'heart failure' OR 'cardia failure' OR (('cardia'/exp OR cardia) AND ('failure'/exp OR failure)) OR 'heart decompensation'/exp OR 'heart decompensation' OR 'decompensation heart'/exp OR 'decompensation heart' OR 'myocardial failure'/exp OR 'myocardial failure' OR 'hf'/exp OR 'hf' OR 'HFpEF' | | 879,535 | |
| #3 | 'ventricular dysfunction, right'/exp OR 'ventricular dysfunction, right' OR 'right ventricular dysfunction'/exp OR 'right ventricular dysfunction' OR 'dysfunction, right ventricular' OR 'dysfunctions, right ventricular' OR 'right ventricular dysfunctions' OR 'ventricular dysfunctions, right' OR 'hypertension, pulmonary'/exp OR 'hypertension, pulmonary' OR 'pulmonary hypertension'/exp OR 'pulmonary hypertension' OR 'ph'/exp OR 'ph' | | 1,063,434 | |
| #4 | #1 AND #2 AND #3 | | 2,116 | |
| **Search strategy in Cochrane Library** | | | | |
| #1 | | | MeSH descriptor, [Heart Failure, Diastolic] explode all trees | 147 |
| #2 | | | ( Cardia Failure),ti,ab,kw OR ( Heart Decompensation),ti,ab,kw OR ( Decompensation heart),ti,ab,kw OR ( myocardial failure ),ti,ab,kw OR (HF),ti,ab,kw OR (HFpEF),ti,ab,kw | 24,326 |
| #3 | | | #1 OR #2 | 24,387 |
| #4 | | | [Ventricular Dysfunction, Right] explode all trees OR (Right Ventricular Dysfunction),ti,ab,kw OR (Dysfunction, Right Ventricular),ti,ab,kw OR (Dysfunctions, Right Ventricular ),ti,ab,kw OR (Right Ventricular Dysfunctions),ti,ab,kw OR (Ventricular Dysfunctions, Right),ti,ab,kw | 1197 |
| #5 | | | MeSH descriptor, [Ventricular Dysfunction, Right] explode all trees | 242 |
| #6 | | | #4 OR #5 | 1,197 |
| #7 | | | MeSH descriptor, [Hypertension, Pulmonary] explode all trees | 1,699 |
| #8 | | | (Pulmonary Hypertension ),ti,ab,kw OR (PH),ti,ab,kw | 25,059 |

**Continue**

| #9 | #7 OR #8 | 25,066 |
| --- | --- | --- |
| #10 | #3 AND (#6 OR #9) | 787 |
| **Search strategy in Web of science** | | |
| #1 | TS=(preserved ejection fraction ) | 27,174 |
| #2 | TS=(Heart Failure or Cardia Failure or Heart Decompensation or Decompensation heart or myocardial failure or HF) | 775,261 |
| #3 | TS=(Ventricular Dysfunction Right or Right Ventricular Dysfunction or Dysfunction Right Ventricular or Dysfunctions Right Ventricular or Right Ventricular Dysfunctions or Ventricular Dysfunctions Right OR Hypertension Pulmonary or Pulmonary Hypertension or PH) | 1,605,291 |
| #4 | # 1 AND # 2 AND # 3 | 3,136 |
| **Search strategy in China National Knowledge Infrastructure** | | |
| #1 | SU% = (Preserved Ejection Fraction) * (Right Ventricular Dysfunction + Right Heart Failure + Right Cardiac Decompensation + Right Heart Failure + Right-Sided Heart Failure + Pulmonary Hypertension + Pulmonary Pressure + Pulmonary Artery Systolic Pressure + Pulmonary Artery Diastolic Pressure + Pulmonary Capillary Wedge Pressure) | 3,976 |

**Table S2. AHRQ quality assessment criteria.**

| Criteria | Yes | No | Unclear |
| --- | --- | --- | --- |
| 1) Define the source of information (survey, record review) |  |  |  |
| 2) List inclusion and exclusion criteria for exposed and unexposed subjects (cases and controls) or refer to previous publications |  |  |  |
| 3) Indicate time period used for identifying patients |  |  |  |
| 4) Indicate whether or not subjects were consecutive if not population-based |  |  |  |
| 5) Indicate if evaluators of subjective components of study were masked to other aspects of the status of the participants |  |  |  |
| 6) Describe any assessments undertaken for quality assurance purposes (e.g., test/retest of primary outcome measurements) |  |  |  |
| 7) Explain any patient exclusions from analysis |  |  |  |
| 8) Describe how confounding was assessed and/or controlled. |  |  |  |
| 9) If applicable, explain how missing data were handled in the analysis |  |  |  |
| 10) Summarize patient response rates and completeness of data collection |  |  |  |
| 11) Clarify what follow-up, if any, was expected and the percentage of patients for which incomplete data or follow-up was obtained |  |  |  |
| Scoring and Quality Classification：Each item is scored as,"Yes" = 1 point， "No" or "Unclear" = 0 points. Total score ranges from 0 to 11, with quality levels defined as, low quality, 0–3 points, moderate quality, 4–7 points, high quality, 8–11 points. | | | |

**Table S3. Characteristics of individual studies.**

| **No.** | **Autho** | **AHRQ** | **Area** | **No. of HFpEF patients** | **Study design** | **LVEF cut-off %** | **Structural heart disease** | **Diastolic dysfunct-ion** | **Elevated BNP** | **Elevated LVFP/ PCWP** | **Symptoms or signs of HF** | **Comment on HFpEF criteria** | **RV measure** | **RVD and dilatation definition** | **PH measure** | **PH definition** |
| --- | --- | --- | --- | --- | --- | --- | --- | --- | --- | --- | --- | --- | --- | --- | --- | --- |
| 1 | Hua-20241 | 7 | China | 618 | retrospective | 50 |  | √ | √ | √ |  | Stringent |  |  | PASP | 48.1% |
| 2 | Mostafa-20192 | 6 | India | 50 | prospective | 50 | • | • | √ |  | √ | Stringent | FAC, TAPSE, RVS', GLS | FAC < 35% (18%), TAPSE < 16 mm (22%), RVS' < 9.5 cm/s (14%), GLS > −20% (26%) | PASP | 14% |
| 3 | Santas-20203 | 7 | Spain | 884 | prospective | 50 | √ | √ | √ | • | √ | Stringent | TAPSE/PASP | TAPSE/PASP < 0.36 (39.8%) |  |  |
| 4 | Kobayashi-20194 | 8 | United States | 186 | retrospective | 50 |  |  |  |  | √ | Lenient | TAPSE, FAC, GLS | TAPSE < 16 mm (27%), FAC < 35% (24%), RVLS ≥ -20% (25%), |  | RVSP ≥ 40 mmHg (75%) |
| 5 | Roy-20185 | 8 | Belgium | 118 | prospective | 50 | • | • | √ |  | √ | Stringent | TAPSE, FAC, RVEF | RVEF ≤ 45% (14%), FAC ≤ 35% (27%),TAPSE ≤ 16mm (40%) |  | RV-RA radient > 35mmhg (39%) |
| 6 | Kanagala-20206 | 8 | United Kingdom | 140 | prospective | 50 |  |  |  |  |  | Lenient | RVEF | RVEF ≤ 47% (19%) |  |  |
| 7 | Lyu-20197 | 8 | China | 343 | prospective | 50 |  |  |  |  |  | Lenient | TAPSE, RVEDD | RV dilatation, RVEDD > 25mm (11.4%), RVD, TAPSE < 16 mm (5.8%) | PASP | PASP > 40 mmHg (19.2%) |
| 8 | Zhang-20218 | 6 | China | 150 | prospective | 50 | • | • | √ |  | √ | Stringent | FAC, TAPSE, TR, IVC | RVD (56%) exists when any of the following criteria is satisfied, FAC < 35%, TAPSE < 17 mm, TR > 2.8 m/s, IVC diameter > 21 mm, IVC collapse index < 50% at the end of inspiration |  |  |

**Continue**

| **No.** | **Autho** | **AHRQ** | **Area** | **No. of HFpEF patients** | **Study design** | **LVEF cut-off %** | **Structural heart disease** | **Diastolic dysfunct-ion** | **Elevated BNP** | **Elevated LVFP/ PCWP** | **Symptoms or signs of HF** | **Comment on HFpEF criteria** | **RV measure** | **RVD and dilatation definition** | **PH measure** | **PH definition** |
| --- | --- | --- | --- | --- | --- | --- | --- | --- | --- | --- | --- | --- | --- | --- | --- | --- |
| 9 | Obokata-20199 | 7 | United States | 271 | prospective | 50 |  |  |  | √ | √ | Stringent | FAC | FAC < 35% (12%) |  |  |
| 10 | Gorter-201810 | 6 | United States | 91 | prospective | 45 |  |  |  |  | √ | Lenient | FAC, TAPSE, RVS', RVFLS | RVD (7%) defined as at least two RV systolic function parameters falling, TAPSE < 17 mm, RVS' < 9.5 cm/s, FAC < 35%, RV FWS > −20% |  |  |
| 11 | Ghio-201711 | 7 | Italy | 384 | retrospective | 50 |  |  |  |  | √ | Lenient | TAPSE | TAPSE < 14 mm (4%） | PASP | PASP > 40 mmHg (10%） |
| 12 | Palazzuoli-202312 | 8 | Italy | 145 | prospective,multi-center | 50 |  |  | √ |  |  | Stringent | FAC, TAPSE，RVS', S'/PASP, TAPSE/PASP, RV EDD, ICV, TR | TAPSE < 16 mm, RVS' < 9 cm/s | PASP | PASP > 40 mmHg |
| 13 | Johansson-202213 | 7 | Sweden | 17 | prospective | 50 | • | √ | • | • | √ | Stringent | FAC, TAPSE, RVS', RVFLS, RVADI | RVD (18%）was defined as at least two of the following, increased RVADI (men > 12.6 cm2/m2, women > 11.5 cm2/m2), FAC < 35%, TAPSE < 17 mm, RVS'< 9.5 cm/s, RVFWS> -20% and increased estimated RAP |  |  |

**Continue**

| **No.** | **Autho** | **AHRQ** | **Area** | **No. of HFpEF patients** | **Study design** | **LVEF cut-off %** | **Structural heart disease** | **Diastolic dysfunct-ion** | **Elevated BNP** | **Elevated LVFP/ PCWP** | **Symptoms or signs of HF** | **Comment on HFpEF criteria** | **RV measure** | **RVD and dilatation definition** | **PH measure** | **PH definition** |
| --- | --- | --- | --- | --- | --- | --- | --- | --- | --- | --- | --- | --- | --- | --- | --- | --- |
| 14 | Lo-201914 | 6 | United States | 81 | retrospective | 50 |  |  | √ | √ |  | Stringent | NA | 25% |  |  |
| 15 | Raeisi-Giglou-2017*15 | 8 | United States | 149 | prospective | 50 |  | √ |  |  | √ | Stringent | Visual estimation | RVD (56%） |  |  |
| 16 | Gorter-201816 | 6 | United States | 161 | prospective | 50 |  |  |  | √ | √ | Stringent |  |  |  | PAMP > 25 mmHg (87%) |
| 17 | Pugliese-202217 | 7 | Italy | 90 | prospective | 50 | • | • | √ |  |  | Stringent |  |  |  | PAMP > 20 mmHg (49%) |
| 18 | Roy-202018 | 7 | Belgium | 142 | prospective | 50 | • | • | √ |  | √ | Stringent | TAPSE, FAC | TAPSE < 17 mm (43.7%), FAC < 35% (31.7%), RVEF < 45% (14.8%) |  | RV-RA gradient > 37 mmHg (32.4%） |
| 19 | Marechaux-201119 | 6 | France | 70 | prospective | 50 |  |  |  |  | √ | Lenient (physical and radiographic evidence of pulmonary congestion) |  |  | PASP | PASP > 35 mmHg (35%) |
| 20 | Dalos-201620 | 7 | Austria | 193 | prospective | 50 |  | √ | √ |  | √ | Stringent | TAPSE, FAC | TAPSE < 16 mm (22.2%), FAC < 35% (23.8%) |  |  |
| 21 | Harada-202221 | 6 | Japan | 328 | retrospective | 50 | • | • | • | • | √ | Stringent | TAPSE, RV diameter | RV dilatation (13.7%) |  |  |

**Continue**

| **No.** | **Autho** | **AHRQ** | **Area** | **No. of HFpEF patients** | **Study design** | **LVEF cut-off %** | **Structural heart disease** | **Diastolic dysfunct-ion** | **Elevated BNP** | **Elevated LVFP/ PCWP** | **Symptoms or signs of HF** | **Comment on HFpEF criteria** | **RV measure** | **RVD and dilatation definition** | **PH measure** | **PH definition** |
| --- | --- | --- | --- | --- | --- | --- | --- | --- | --- | --- | --- | --- | --- | --- | --- | --- |
| 22 | Duca-201822 | 7 | Austria | 260 | prospective | 50 |  | √ | √ | √ | √ | Stringent | TAPSE, TAPSE/PASP | TAPSE/PASP < 0.36 (43.5%) | PASP |  |
| 23 | Yamazaki-202123 | 6 | Japan | 28 | retrospective | 50 |  |  |  |  | √ | Lenient |  |  |  | RVSP ≥ 50mmhg (22%) |
| 24 | Shah-201424 | 6 | United States | 935 | prospective RCT/substudy | 45 |  |  | √ |  |  | Lenient |  |  | PASP | PASP ≥ 39mmHg (36%) |
| 25 | Bytyci -201925 | 6 | Sweden | 143 | prospective | 45 |  | √ |  |  | √ | Lenient | TAPSE | TAPSE < 17mm (28%) |  |  |
| 26 | Liu-202026 | 7 | China | 149 | prospective | 50 | √ | √ | √ |  | √ | Stringent |  |  | PASP | PASP > 35 mmHg (39.6%) |
| 27 | Trejo-202227 | 8 | Spain | 58 | retrospective | NA | • |  | • |  | √ | Lenient | TAPSE, RVS', TAPSE/PASP, RVEF | RVEF < 45% (20.7%） | PASP > 35 mmHg | PASP > 35 mmHg[69% by TTE, 85.7% by RCH (28RCH)] |
| 28 | Aschauer-201728 | 7 | Austria | 230 | prospective | 50 |  | √ | √ | √ | √ | Stringent | TAPSE, FAC | FAC < 35%\TAPSE < 18mm (28.3%） | PASP, PAMP, PCWP |  |
| 29 | Nitsche-202029 | 7 | Austria | 155 | prospective | 50 | • | • | √ | √ | √ | Stringent |  |  | PASP | PAMP ≥ 25 mmHg (78.1%) |
| 30 | Nishihara-201930 | 8 | Japan | 183 | retrospective | 50 |  | √ | √ |  | √ | Stringent |  |  | PAMP | PAMP ≥ 25 mmHg (17.5%) |

**Continue**

| **No.** | **Autho** | **AHRQ** | **Area** | **No. of HFpEF patients** | **Study design** | **LVEF cut-off %** | **Structural heart disease** | **Diastolic dysfunct-ion** | **Elevated BNP** | **Elevated LVFP/ PCWP** | **Symptoms or signs of HF** | **Comment on HFpEF criteria** | **RV measure** | **RVD and dilatation definition** | **PH measure** | **PH definition** |
| --- | --- | --- | --- | --- | --- | --- | --- | --- | --- | --- | --- | --- | --- | --- | --- | --- |
| 31 | Morris-201731 | 8 | Germany | 218 | prospective | 50 |  | √ | √ | √ |  | Stringent | TAPSE, FAC, S', RV FWS, RV GLS | TAPSE < 16mm (6%), RVFAC < 35% (5%), RVS'< 9.5cm/s (5.5%), RVFWS > -19% (10.1%), RVGLS > -17% (11.5%) | PASP | PASP > 35 mmHg (17.9%) |
| 32 | Salamon-2014*32 | 7 | United States | 373 | prospective | 50 | • | • | • | • | √ | Stringent | Semiquantitative analysis of RVD and dilation | RVD (46%), RV dilation (38%) |  |  |
| 33 | Lam-200933 | 7 | United States | 203 | prospective | 50 |  |  |  |  | √ | Lenient |  |  |  | PASP > 35 mmHg (83%) |
| 34 | Farrero-201434 | 6 | Spain | 28 | prospective | 50 |  |  |  |  |  | Lenient | TAPSE |  | PASP | PASP > 35 mmHg (78%) |
| 35 | Nakamura-201935 | 8 | Japan | 198 | prospective | 50 |  |  |  |  | √ | Lenient |  |  | PCWP, PAMP | PAMP > 25 mmHg (46%) |
| 36 | Bourji-2017*36 | 6 | United States | 24 (echo20） | prospective | 50 |  |  |  |  |  | Lenient |  | RVD (5%), RV dilation (45%) |  |  |
| 37 | Kanagala-202037 | 6 | United Kingdom | 135 | prospective | 50 |  |  |  |  | √ | Lenient |  | RVEF < 47% (19%） |  |  |
| 38 | Damy-201238 | 6 | United Kingdom | 309 | prospective | 45 |  |  |  |  | √ | Lenient |  | TAPSE < 15.9mm (20%） |  |  |
| 39 | Huang-202239 | 7 | China | 142 | prospective | NA |  |  |  |  |  | Lenient |  |  | PAMP | PAMP ≥ 25 mmHg (76.1%) |

**Continue**

| **No.** | **Autho** | **AHRQ** | **Area** | **No. of HFpEF patients** | **Study design** | **LVEF cut-off %** | **Structural heart disease** | **Diastolic dysfunct-ion** | **Elevated BNP** | **Elevated LVFP/ PCWP** | **Symptoms or signs of HF** | **Comment on HFpEF criteria** | **RV measure** | **RVD and dilatation definition** | **PH measure** | **PH definition** |
| --- | --- | --- | --- | --- | --- | --- | --- | --- | --- | --- | --- | --- | --- | --- | --- | --- |
| 40 | Burke-201442 | 7 | United States | 419 | prospective | 50 |  | √ | √ | √ |  | Stringent | TAPSE, FAC, RVEDD | TAPSE < 16mm (15%）, FAC < 35% (34%）, RV end-diastolic free wall thickness > 5.0 mm (28%） | PASP |  |
| 41 | Cenkerova-201641 | 7 | South Korea | 63 | prospective | 40 |  |  |  |  |  | Lenient |  | RVS' < 10.8cm/s (25.4%) |  |  |
| 42 | Gargani-202142 | 8 | Italy | 97 | prospective | 50 | • | • | √ |  |  | Stringent | TAPSE | TAPSE < 17mm (15%） |  |  |
| 43 | Robaeys-201743 | 6 | Netherlands | 61 | prospective | 50 |  |  |  |  |  | Lenient |  | RV dilation (33%), TAPSE/PASP < 40mm/mmHg (28%) |  |  |
| 44 | Karakus-201544 | 8 | Austria | 111 | prospective | 50 |  | √ | √ |  | √ | Stringent |  |  | PAMP | Moderate or severe PH, PAMP > 30mmHg (64%) |
| 45 | Nakagawa-202045 | 8 | Japan | 655 | prospective | 50 |  |  | √ |  |  | Stringent | TAPSE/PASP | TAPSE/PASP < 0.48 (38.9%) |  |  |
| 46 | Baratto-202346 | 7 | Italy | 30 | retrospective | 50 |  |  |  | √ | √ | Stringent |  | Moderate/severe RV dilation (33%) |  |  |
| 47 | Gorter-201847 | 6 | Netherlands | 91 | prospective | 45 |  |  |  |  | √ | Lenient |  | RVD (38.5%) was defined when at least 2 parameter were below the lower limi of normal, TAPSE < 17mm, RVS '< 9.5 cm/s, FAC < 35%, and RV FWS > −20% |  |  |
| 48 | Melenovsky-201448 | 8 | United States | 96 | retrospective | 50 |  |  |  | √ | √ | Stringent | FAC | FAC < 35% (33%) | PAMP | PAMP ≥ 25 mmHg (81%) |
| 49 | van Wezenbeek -202249 | 6 | Netherlands | 46 | retrospective | NA |  |  |  | √ |  | Lenient |  |  | PCWP, PAMP | PAMP ≥ 25 mmHg, PCWP ≥ 15 mmHg (71.7%) |

**Continue**

| **No.** | **Autho** | **AHRQ** | **Area** | **No. of HFpEF patients** | **Study design** | **LVEF cut-off %** | **Structural heart disease** | **Diastolic dysfunct-ion** | **Elevated BNP** | **Elevated LVFP/ PCWP** | **Symptoms or signs of HF** | **Comment on HFpEF criteria** | **RV measure** | **RVD and dilatation definition** | **PH measure** | **PH definition** |
| --- | --- | --- | --- | --- | --- | --- | --- | --- | --- | --- | --- | --- | --- | --- | --- | --- |
| 50 | Nakagawa-202250 | 9 | Japan | 754 | prospective | 50 |  |  | √ |  | √ | Stringent | TAPSE/PASP | TAPSE/PASP < 0.46 (38.2%) | PASP |  |
| 51 | Mukherjee-201751 | 6 | United States | 104 | prospective | 55 |  |  |  |  |  | Lenient | FAC | FAC < 35% (9%) | RVSP | RVSP ≥ 35 mmHg (53%) |
| 52 | Deng-202352 | 7 | China | 210 | prospective | 50 |  |  |  |  |  | Stringent (HFA-PEFF ) | TAPSE, RVS' | TAPSE < 17 mm and RVS' < 9.5 cm/s (34.2%) | PASP |  |
| 53 | Aschauer-201653 | 7 | Austria | 171 | prospective | 50 |  | √ | √ |  | √ | Stringent | TAPSE, FAC | RVEF < 45% (19.3%), FAC < 35% (25.1%), TAPSE < 16mm (10.5%) | PASP,PAMP |  |
| 54 | Lindley-202054 | 6 | United States | 37 | retrospective | 50 |  |  | √ |  | √ | Stringent | TAPSE | RV dilation (19.4%) |  |  |
| 55 | Bosch-201755 | 7 | Singapore | 219 | prospective | 50 |  |  |  |  |  | Lenient | FAC, TAPSE, RVS', GLS | TAPSE < 17 mm (42%), RVGLS > −20% (32%) | PAMP,PASP,PCWP,PVR | PASP > 35 mmHg (39%) |
| 56 | Mohammed-201456 | 8 | United States | 500 | prospective | 50 |  |  |  |  | √ | Lenient | TAPSE, Semi-quantitative RV size (23.6%) | TAPSE < 16 mm (35%） |  |  |
| 57 | Morris-201157 | 8 | Germany | 201 | Prospective | 50 | • | • |  | • | √ | Stringent | TAPSE, FAC | TAPSE < 16 mm (48.7%), FAC ≤ 35% (28.3%),GLS > -16% (75.1%) | PASP | PASP ≥ 41 mmHg (52.7%) |
| 58 | Guazzi-201358 | 8 | Italy | 46 | prospective | NA |  |  | √ |  |  | Stringent | TAPSE | TAPSE < 16 mm (35%） | PASP |  |
| 59 | Hussain-201659 | 6 | United States | 137 | prospective RCT/substudy | 50 | • |  |  | • | √ | Stringent | TAPSE | TAPSE < 16mm (44.4%) | PASP | PASP ≥ 35 mmHg (69.3%) |

**Continue**

| **No.** | **Autho** | **AHRQ** | **Area** | **No. of HFpEF patients** | **Study design** | **LVEF cut-off %** | **Structural heart disease** | **Diastolic dysfunct-ion** | **Elevated BNP** | **Elevated LVFP/ PCWP** | **Symptoms or signs of HF** | **Comment on HFpEF criteria** | **RV measure** | **RVD and dilatation definition** | **PH measure** | **PH definition** |
| --- | --- | --- | --- | --- | --- | --- | --- | --- | --- | --- | --- | --- | --- | --- | --- | --- |
| 60 | Hanboly-202160 | 6 | Egypt | 50 | prospective | 50 |  | √ |  | √ |  | Stringent |  | TAPSE < 17 mm (34%）, RVS' < 9.5cm/s (32%), FAC < 35% (30%), Tei > 0.54 (36%) |  |  |
| 61 | Lejeune-202061 | 7 | Belgium | 149 | prospective | 50 | √ | √ | √ |  | √ | Stringent | TAPSE,FAC,RVFWLS,RVGLS,RVEF | TAPSE < 17mm (37%), FAC < 35% (26%), RV FWS > -18.1% (25%), RV GLS > - 17.5% (19%), RVEF < 45% (10%) |  |  |
| 62 | Martinez Santos-201662 | 7 | Spain | 103 | Prospective | 50 |  | √ | √ | √ |  | Stringent | TAPSE | TAPSE < 17mm (27%) |  |  |
| 63 | Puwanant-200963 | 6 | United States | 51 | prospective | 50 |  |  |  |  |  | Lenient | RV FAC, Tei, RVS' | FAC < 45% (33%), RVS' < 11.5cm/s (50%), Tei < 15mm (40%) | PASP |  |
| 64 | Stein-201264 | 6 | Israel | 5,534 | retrospective | 45 |  |  |  |  |  | Lenient | NA | RVD (4.4%) |  | PASP ≥ 40 mmHg (27.5%) |
| 65 | Rifaie-201065 | 7 | Egypt | 100 | prospective | 50 |  | √ |  |  |  | Stringent |  |  |  | PASP > 37 mmHg (20%) |
| 66 | Vanhercke-201566 | 8 | Belgium | 193 | prospective | 50 |  |  |  |  |  | Lenient |  |  | PASP | TR > 30 mmHg (73%) |
| 67 | Kalogeropoulos-201467 | 6 | United States | 104 | retrospective | 45 |  | √ | √ |  | √ | Lenient |  | RVD (5.2%) |  | PASP ≥ 35 mmHg (42.3%) |
| 68 | Orozco-201068 | 6 | Mexico | 30 | prospective | 45 | √ | √ |  |  |  | Lenient |  | FAC < 35% |  | PASP ≥ 35 mmHg (77%) |
| 69 | Schwartzenberg-201269 | 7 | United States | 83 | prospective | 50 |  |  |  |  | √ | Lenient | NA | RVD (18.1%) |  |  |

**Continue**

| **No.** | **Autho** | **AHRQ** | **Area** | **No. of HFpEF patients** | **Study design** | **LVEF cut-off %** | **Structural heart disease** | **Diastolic dysfunct-ion** | **Elevated BNP** | **Elevated LVFP/ PCWP** | **Symptoms or signs of HF** | **Comment on HFpEF criteria** | **RV measure** | **RVD and dilatation definition** | **PH measure** | **PH definition** |
| --- | --- | --- | --- | --- | --- | --- | --- | --- | --- | --- | --- | --- | --- | --- | --- | --- |
| 70 | Shi-202470 | 8 | China | 466 | retrospective | 50 | • | • | √ |  | √ | Stringent |  | TAPSE/PASP ≤ 0.35mm/mmHg (43.6%） |  |  |
| 71 | Zhu-202071 | 6 | China | 218 | prospective | 50 | • | • | • | • | √ | Stringent | RV S, FAC, FWLS, Tei, RVEDD, RVEDA | RVD (37.2%)defined as at least two RV systolic function parameters falling., RV S' < 9.5 cm/s, RV FAC < 35%, and/or RV FWS > -20% |  |  |
| 72 | Gou-202272 | 6 | China | 203 | prospective | 50 | • | • | • |  | √ | Stringent | TAPSE, FAC | RVD (51.7%)defined as at least two RV systolic function parameters falling, TAPSE < 17 mm (57.7%), FAC < 35% (32.6%), RVS' < 9.5 cm/s (18.2%), Tei > 0.43 (46.2%) | PASP | PASP > 35 mmHg (72.4%) |
| 73 | Gou-202073 | 7 | China | 461 | prospective | 50 | • | • | • |  | √ | Stringent |  | Right heart dilation (50.3%) | PASP | PASP > 35 mmHg (61%) |

Note, Conditions marked with "•" require that at least one is satisfied, while those marked with "√" must be fulfilled. * marked with study patients were HFpEF with PH.

**Table S4.** **Characteristics of individual studies included in group comparison analyses.**

| **Author** | **Criteria** | **Area** | **Number** | **Year of publication** | **Gender** | **Study design** | **Severe Pulmonary Diseases Exclusion** | **Severe Renal Diseases Exclusion** | **DM** | **CAD** | **NYHA Functional Classification Ⅲ-Ⅳ** | **AF** | **HTN** | **COPD** | **Obesity** | **AHRQ score** |
| --- | --- | --- | --- | --- | --- | --- | --- | --- | --- | --- | --- | --- | --- | --- | --- | --- |
| Mostafa-20192 | Stringent | Asia | <200 | post-2016 | ≤50 | prospective | Y | N | <30% | <30% | 25-50% | NS | ≤75% | NS | ≤30% | 6 |
| Kobayashi-20194 | Lenient | North America | <200 | post-2016 | >50 | retrospective | Y | Y | 30-40% | 30-40% | NS | ≤50% | >75% | NS | NS | 8 |
| Roy-20185 | Stringent | Europe | <200 | post-2016 | >50 | prospective | Y | Y | 30-40% | 30-40% | 25-50% | >50% | >75% | NS | NS | 8 |
| Lyu-20197 | Lenient | Asia | ≥200 | post-2016 | >50 | prospective | N | N | <30% | NS | >50% | NS | ≤75% | ≤20% | NS | 8 |
| Ghio-201711 | Lenient | Europe | ≥200 | post-2016 | ≤50 | retrospective | Y | N | NS | 30-40% | NS | ≤50% | NS | NS | NS | 7 |
| Roy-202018 | Stringent | Europe | <200 | post-2016 | >50 | prospective | Y | N | 30-40% | NS | 25-50% | >50% | >75% | ≤20% | NS | 7 |
| Dalos-201620 | Stringent | Europe | <200 | post-2016 | >50 | prospective | N | N | 30-40% | 30-40% | NS | >50% | >75% | >20% | NS | 7 |
| Bytyci -201925 | Stringent | Europe | ≥200 | post-2016 | >50 | prospective | Y | Y | NS | NS | NS | NS | NS | NS | NS | 6 |
| Morris-201731 | Stringent | Europe | ≥200 | post-2016 | >50 | prospective | Y | Y | 30-40% | 30-40% | NS | ≤50% | >75% | NS | ≤30% | 8 |
| Damy-201238 | Lenient | Europe | ≥200 | pre-2016 | >50 | prospective | N | N | <30% | NS | <25% | ≤50% | ≤75% | >20% | NS | 6 |
| Burke-201440 | Stringent | North America | ≥200 | pre-2016 | >50 | prospective | N | N | 30-40% | 30-40% | 25-50% | ≤50% | >75% | >20% | >30% | 7 |
| Gargani-202142 | Stringent | Europe | <200 | post-2016 | >50 | prospective | N | N | 30-40% | <30% | 25-50% | ≤50% | ≤75% | NS | NS | 8 |
| Aschauer-201653 | Stringent | Europe | <200 | pre-2016 | >50 | prospective | N | Y | >40% | <30% | 25-50% | >50% | >75% | NS | NS | 7 |
| Bosch L-201755 | Lenient | Asia | ≥200 | post-2016 | >50 | prospective | N | N | >40% | 30-40% | <25% | ≤50% | >75% | NS | NS | 7 |
| Mohammed-201456 | Lenient | North America | ≥200 | pre-2016 | >50 | prospective | Y | N | 30-40% | 30-40% | NS | ≤50% | >75% | >20% | NS | 8 |
| Morris-201157 | Stringent | Europe | ≥200 | pre-2016 | ≤50 | prospective | Y | Y | 30-40% | 30-40% | NS | ≤50% | >75% | NS | >30% | 8 |
| Guazzi-201358 | Lenient | Europe | <200 | pre-2016 | ≤50 | prospective | N | N | NS | NS | NS | NS | NS | NS | NS | 8 |
| Hussain-201659 | Stringent | North America | <200 | post-2016 | >50 | prospective | N | N | 30-40% | NS | NS | >50% | >75% | ≤20% | NS | 6 |
| Hanboly-202160 | Stringent | Asia | <200 | post-2016 | >50 | prospective | N | N | NS | NS | NS | NS | NS | NS | NS | 5 |
| Lejeune-202061 | Stringent | Europe | <200 | post-2016 | >50 | prospective | Y | N | >40% | NS | 25-50% | >50% | >75% | ≤20% | NS | 7 |
| Martinez Santos-201662 | Stringent | Europe | <200 | post-2016 | >50 | prospective | N | Y | NS | NS | NS | NS | NS | >20% | >30% | 7 |
| Puwanant-200963 | Stringent | North America | <200 | pre-2016 | ≤50 | prospective | N | N | <30% | 30-40% | >50% | NS | NS | >20% | NS | 5 |
| Gou-202273 | Stringent | Asia | ≥200 | post-2016 | >50 | prospective | N | Y | 30-40% | <30% | >50% | ≤50% | >75% | >20% | NS | 6 |

**Table S5.** **Egger’s test for pevalence of RVD and PH publication bias**

| Measure | t | df | p | Bias estimate |
| --- | --- | --- | --- | --- |
| TAPSE | 0.78 | 21 | 0.4458 | 2.7928 (SE = 3.5946) |
| FAC | 0.1 | 14 | 0.9252 | 0.2931 (SE = 3.0658) |
| S' | 2.02 | 4 | 0.113 | 7.2266 (SE = 3.5705) |
| GLS | -0.44 | 4 | 0.6813 | -6.6756 (SE = 15.1017) |
| RVEF | 0.54 | 5 | 0.6114 | 1.7842 (SE = 3.2951) |
| Tei | -4.59 | 1 | 0.1365 | -2.5063 (SE = 0.5457) |
| TAPSE/PASP | -1.01 | 4 | 0.3702 | -2.1692 (SE = 2.1504) |
| RV dilation | 2.86 | 11 | 0.0155 | 9.1892 (SE = 3.2128) |
| RVDa | -1.03 | 4 | 0.3611 | -2.5350 (SE = 2.4607) |
| RVDb | 2.97 | 3 | 0.593 | 9.8092 (SE = 3.3081) |
| PASP-PH | 2.7 | 22 | 0.013 | 5.4625 (SE = 2.0209) |
| PAMP-PH | 0.77 | 7 | 0.4684 | 8.4637 (SE = 11.0421) |

**Table S6. Leave-one-out sensitivity analysis for meta-analysis of prevalence of RVD and PH with fewer than 10 studies**

| **S'** |  |  |  |  |  |  |
| --- | --- | --- | --- | --- | --- | --- |
|  | **Study_Removed** | **Pooled_Estimate** | **Lower_CI** | **Upper_CI** | **I2** | **Tau2** |
| **1** | Mostafa-20192 | 0.5140996 | 0.3329377 | 0.6952615 | 0.9410505 | 0.039538 |
| **2** | Morris-201731 | 0.5462823 | 0.4084943 | 0.6840703 | 0.8425123 | 0.02078229 |
| **3** | Hanboly-202160 | 0.47227 | 0.2921866 | 0.6523533 | 0.9340417 | 0.03903171 |
| **4** | Puwanant-200963 | 0.4313532 | 0.3063093 | 0.5563971 | 0.8895349 | 0.01723366 |
| **5** | Gou-202272 | 0.5044932 | 0.3155349 | 0.6934515 | 0.9406014 | 0.04251923 |
| **6** | Cenkerova-201642 | 0.4864891 | 0.299168 | 0.6738101 | 0.9380552 | 0.04229182 |
| **GLS** |  |  |  |  |  |  |
|  | **Study_Removed** | **Pooled_Estimate** | **Lower_CI** | **Upper_CI** | **I2** | **Tau2** |
| **1** | Mostafa-20192 | 0.5941352 | 0.3562283 | 0.8320421 | 0.9830515 | 0.072359272 |
| **2** | Morris-201631 | 0.6041215 | 0.3731533 | 0.8350896 | 0.9777255 | 0.067383682 |
| **3** | Kobayashi-20194 | 0.5670481 | 0.3140624 | 0.8200338 | 0.9834288 | 0.081288058 |
| **4** | Lejeune-202061 | 0.5828053 | 0.3353689 | 0.8302418 | 0.9826983 | 0.077742245 |
| **5** | Morris-201157 | 0.4652285 | 0.3709638 | 0.5594932 | 0.8772768 | 0.009662356 |
| **6** | Bosch-201755 | 0.5520693 | 0.2991133 | 0.8050254 | 0.9836488 | 0.081227233 |
| **RVEF** |  |  |  |  |  |  |
|  | **Study_Removed** | **Pooled_Estimate** | **Lower_CI** | **Upper_CI** | **I2** | **Tau2** |
| **1** | Roy-20185 | 0.4167509 | 0.3721418 | 0.46136 | 0.3646788 | 0.001160097 |
| **2** | Roy-202018 | 0.4163629 | 0.3707462 | 0.4619796 | 0.3709561 | 0.001237598 |
| **3** | Trejo-202227 | 0.4078146 | 0.3669373 | 0.4486918 | 0.3117671 | 0.00084841 |
| **4** | Kanagala-202137 | 0.4073621 | 0.3634186 | 0.4513056 | 0.3317337 | 0.001029422 |
| **5** | Aschauer-201653 | 0.4038168 | 0.361605 | 0.4460286 | 0.2460117 | 0.000724028 |
| **6** | Lejeune-202061 | 0.4296996 | 0.3942451 | 0.4651541 | 0 | 0 |
| **7** | Kanagala-20206 | 0.4088333 | 0.3638976 | 0.453769 | 0.3568005 | 0.00114969 |

**Continue**

| **Tei** |  |  |  |  |  |  |
| --- | --- | --- | --- | --- | --- | --- |
|  | **Study_Removed** | **Pooled_Estimate** | **Lower_CI** | **Upper_CI** | **I2** | **Tau2** |
| **1** | Hanboly-202160 | 0.7340186 | 0.6725291 | 0.7955082 | 0 | 0 |
| **2** | Gou-202272 | 0.6602653 | 0.5627535 | 0.7577772 | 0 | 0 |
| **3** | Puwanant-200963 | 0.7139191 | 0.6173148 | 0.8105234 | 0.4338933 | 0.002388081 |
| **TAPSE/PASP** |  |  |  |  |  |  |
|  | **Study_Removed** | **Pooled_Estimate** | **Lower_CI** | **Upper_CI** | **I2** | **Tau2** |
| **1** | Santas-20203 | 0.6680034 | 0.6068803 | 0.7291265 | 0.7367134 | 3.89E-03 |
| **2** | Robaeys-201743 | 0.6863596 | 0.6672524 | 0.7054667 | 0.208807 | 5.46E-05 |
| **3** | Nakagawa-202045 | 0.6702668 | 0.6096909 | 0.7308427 | 0.7331611 | 3.83E-03 |
| **4** | Nakagawa-202250 | 0.6722225 | 0.6122343 | 0.7322108 | 0.7191597 | 3.73E-03 |
| **5** | Shi-202470 | 0.6747166 | 0.6554574 | 0.6939758 | 0.6620542 | 3.39E-06 |
| **6** | Duca-201822 | 0.6667494 | 0.620538 | 0.7129607 | 0.7047764 | 2.06E+00 |
| **RVDa** |  |  |  |  |  |  |
|  | **Study_Removed** | **Pooled_Estimate** | **Lower_CI** | **Upper_CI** | **I2** | **Tau2** |
| **1** | Gorter-201810 | 0.6653641 | 0.5772059 | 0.7535224 | 0.793348 | 7.38E-03 |
| **2** | Johansson-202213 | 0.6837163 | 0.6176402 | 0.7497923 | 0.7390223 | 3.97E-03 |
| **3** | Gorter-201816 | 0.6629366 | 0.5742633 | 0.75161 | 0.7950903 | 7.49E-03 |
| **4** | Deng-202352 | 0.6749487 | 0.5889466 | 0.7609509 | 0.7517602 | 6.57E-03 |
| **5** | Zhu-202071 | 0.6655929 | 0.5739736 | 0.7572122 | 0.7873174 | 7.76E-03 |
| **6** | Gou-202272 | 0.6417131 | 0.6025632 | 0.680863 | 0 | 9.75E-07 |
| **RVDb** |  |  |  |  |  |  |
|  | **Study_Removed** | **Pooled_Estimate** | **Lower_CI** | **Upper_CI** | **I2** | **Tau2** |
| **1** | Aschauer-201653 | 0.5073536 | 0.2536427 | 0.7610644 | 0.9882999 | 0.06509629 |
| **2** | Zhang-20218 | 0.4333311 | 0.2819821 | 0.58468 | 0.9773681 | 0.02211531 |
| **3** | Lo-201914 | 0.5176244 | 0.2642797 | 0.770969 | 0.990583 | 0.06539684 |
| **4** | Stein-201264 | 0.593542 | 0.4194957 | 0.7675884 | 0.9372625 | 0.02935291 |
| **5** | Schwartzenberg-201269 | 0.5373324 | 0.288405 | 0.7862598 | 0.9909017 | 0.06306955 |
| **PAMP-PH** |  |  |  |  |  |  |
|  | **Study_Removed** | **Pooled_Estimate** | **Lower_CI** | **Upper_CI** | **I2** | **Tau2** |
| **1** | van Wezenbeek-202249 | 0.9192767 | 0.7412325 | 1.097321 | 0.9766043 | 0.06412174 |
| **2** | Gorter-201816 | 0.8942098 | 0.7305172 | 1.057902 | 0.9702194 | 0.05344611 |
| **3** | Nitsche-201929 | 0.9083645 | 0.733616 | 1.083113 | 0.9746486 | 0.06124286 |
| **4** | Nakamura-201936 | 0.9516502 | 0.7779958 | 1.125305 | 0.9749241 | 0.06040428 |
| **5** | Melenovsky-201448 | 0.9047536 | 0.7325906 | 1.076917 | 0.9751046 | 0.05950033 |
| **6** | Karakus-201544 | 0.9291995 | 0.7488587 | 1.10954 | 0.9767538 | 0.06545765 |
| **7** | Pugliese-202217 | 0.9480543 | 0.7728314 | 1.123277 | 0.9762675 | 0.06173451 |
| **8** | Nishihara-201930 | 0.9921268 | 0.877206 | 1.107048 | 0.9356839 | 0.02514924 |
| **9** | Huang-202249 | 0.912446 | 0.7356664 | 1.089226 | 0.9754894 | 0.06274806 |

# References

**References**

1. Hua L, Zhang R, Chen R, Shao W. A nomogram for predicting the risk of heart failure with preserved ejection fraction. *Int J Cardiol* 2024;**407**,131973. https,//doi.org/10.1016/j.ijcard.2024.131973

2 Mostafa S. Assessment of right ventricular systolic function in heart failure with preserved, reduced and mid-range ejection fraction. *Indian Heart J* 2019;**71**,406-411. https,//doi.org/10.1016/j.ihj.2019.11.252

3. Santas E, De la Espriella R, Chorro FJ, Palau P, Miñana G, Heredia R*, et al.* Right Ventricular Dysfunction Staging System for Mortality Risk Stratification in Heart Failure With Preserved Ejection Fraction. *J Clin Med* 2020;**9**,831. https,//doi.org/10.3390/jcm9030831

4. Kobayashi Y, Tremblay-Gravel M, Boralkar KA, Li X, Nishi T, Amsallem M*, et al.* Approaching Higher Dimension Imaging Data Using Cluster-Based Hierarchical Modeling in Patients with Heart Failure Preserved Ejection Fraction. *Sci Rep* 2019;**9**,10431. https,//doi.org/10.1038/s41598-019-46873-7

5. Roy C, Slimani A, de Meester C, Amzulescu M, Pasquet A, Vancraeynest D*, et al.* Associations and prognostic significance of diffuse myocardial fibrosis by cardiovascular magnetic resonance in heart failure with preserved ejection fraction. *J Cardiovasc Magn Reson* 2018;**20**,55. https,//doi.org/10.1186/s12968-018-0477-4

6 Kanagala P, Arnold JR, Singh A, Chan D, Cheng A, Khan JN*, et al.* Characterizing heart failure with preserved and reduced ejection fraction, An imaging and plasma biomarker approach. *PLoS One* 2020;**15**,e0232280. https,//doi.org/10.1371/journal.pone.0232280

7. Lyu S, Yu L, Tan H, Liu S, Liu X, Guo X*, et al.* Clinical characteristics and prognosis of heart failure with mid-range ejection fraction, insights from a multi-centre registry study in China. *BMC Cardiovasc Disord* 2019;**19**,209. https,//doi.org/10.1186/s12872-019-1177-1

8. Zhang J, Xu M, Chen T, Zhou Y. Correlation Between Liver Stiffness and Diastolic Function, Left Ventricular Hypertrophy, and Right Cardiac Function in Patients With Ejection Fraction Preserved Heart Failure. *Front Cardiovasc Med* 2021;**8**,748173. https,//doi.org/10.3389/fcvm.2021.748173

9. Obokata M, Reddy Y, Melenovsky V, Pislaru S, Borlaug BA. Deterioration in right ventricular structure and function over time in patients with heart failure and preserved ejection fraction. *Eur Heart J* 2019;**40**,689-697. https,//doi.org/10.1093/eurheartj/ehy809

10. Gorter TM, Streng KW, van Melle JP, Rienstra M, Dickinson MG, Lam C*, et al.* Diabetes Mellitus and Right Ventricular Dysfunction in Heart Failure With Preserved Ejection Fraction. *Am J Cardiol* 2018;**121**,621-627. https,//doi.org/10.1016/j.amjcard.2017.11.040

11. Ghio S, Guazzi M, Scardovi AB, Klersy C, Clemenza F, Carluccio E*, et al.* Different correlates but similar prognostic implications for right ventricular dysfunction in heart failure patients with reduced or preserved ejection fraction. *Eur J Heart Fail* 2017;**19**,873-879. https,//doi.org/10.1002/ejhf.664

12. Palazzuoli A, Cartocci A, Pirrotta F, Vannuccini F, Campora A, Martini L*, et al.* Different right ventricular dysfunction and pulmonary coupling in acute heart failure according to the left ventricular ejection fraction. *Prog Cardiovasc Dis* 2023;**81**,89-97. https,//doi.org/10.1016/j.pcad.2023.07.008

13. Johansson MC, Rosengren A, Fu M. Echocardiographic diagnosis of heart failure with preserved ejection fraction in elderly patients with hypertension. *Scand Cardiovasc J* 2022;**56**,368-377. https,//doi.org/10.1080/14017431.2022.2129777

14. Lo KB, Mezue K, Ram P, Goyal A, Shah M, Krishnamoorthy P*, et al.* Echocardiographic and Hemodynamic Parameters Associated with Diminishing Renal Filtration among Patients with Heart Failure with Preserved Ejection Fraction. *Cardiorenal Med* 2019;**9**,83-91. https,//doi.org/10.1159/000494089

15. Raeisi-Giglou P, Lam L, Tamarappoo BK, Newman J, Dweik RA, Tonelli AR. Evaluation of left ventricular diastolic function profile in patients with pulmonary hypertension due to heart failure with preserved ejection fraction. *Clin Cardiol* 2017;**40**,356-363. https,//doi.org/10.1002/clc.22664

16. Gorter TM, Obokata M, Reddy Y, Melenovsky V, Borlaug BA. Exercise unmasks distinct pathophysiologic features in heart failure with preserved ejection fraction and pulmonary vascular disease. *Eur Heart J* 2018;**39**,2825-2835. https,//doi.org/10.1093/eurheartj/ehy331

17. Pugliese NR, Mazzola M, Madonna R, Gargani L, De Biase N, Dini FL*, et al.* Exercise-induced pulmonary hypertension in HFpEF and HFrEF, Different pathophysiologic mechanism behind similar functional impairment. *Vascul Pharmacol* 2022;**144**,106978. https,//doi.org/10.1016/j.vph.2022.106978

18. Roy C, Lejeune S, Slimani A, de Meester C, Ahn As SA, Rousseau MF*, et al.* Fibroblast growth factor 23, a biomarker of fibrosis and prognosis in heart failure with preserved ejection fraction. *ESC Heart Fail* 2020;**7**,2494-2507. https,//doi.org/10.1002/ehf2.12816

19. Maréchaux S, Neicu DV, Braun S, Richardson M, Delsart P, Bouabdallaoui N*, et al.* Functional mitral regurgitation, a link to pulmonary hypertension in heart failure with preserved ejection fraction. *J Card Fail* 2011;**17**,806-812. https,//doi.org/10.1016/j.cardfail.2011.05.013

20. Dalos D, Mascherbauer J, Zotter-Tufaro C, Duca F, Kammerlander AA, Aschauer S*, et al.* Functional Status, Pulmonary Artery Pressure, and Clinical Outcomes in Heart Failure With Preserved Ejection Fraction. *J Am Coll Cardiol* 2016;**68**,189-199. https,//doi.org/10.1016/j.jacc.2016.04.052

21. Harada T, Obokata M, Omote K, Iwano H, Ikoma T, Okada K*, et al.* Functional Tricuspid Regurgitation and Right Atrial Remodeling in Heart Failure With Preserved Ejection Fraction. *Am J Cardiol* 2022;**162**,129-135. https,//doi.org/10.1016/j.amjcard.2021.09.021

22. Duca F, Zotter-Tufaro C, Kammerlander AA, Aschauer S, Binder C, Mascherbauer J*, et al.* Gender-related differences in heart failure with preserved ejection fraction. *Sci Rep* 2018;**8**,1080. https,//doi.org/10.1038/s41598-018-19507-7

23. Yamazaki R, Nishiyama O, Yoshikawa K, Saeki S, Sano H, Iwanaga T*, et al.* HFpEF without elevated right ventricular systolic pressure is a favorable prognostic indicator in patients with IPF requiring hospitalization for heart failure. *PLoS One* 2021;**16**,e0245778. https,//doi.org/10.1371/journal.pone.0245778

24. Shah AM, Shah SJ, Anand IS, Sweitzer NK, O'Meara E, Heitner JF*, et al.* Cardiac structure and function in heart failure with preserved ejection fraction, baseline findings from the echocardiographic study of the Treatment of Preserved Cardiac Function Heart Failure with an Aldosterone Antagonist trial. *Circ Heart Fail* 2014;**7**,104-115. https,//doi.org/10.1161/CIRCHEARTFAILURE.113.000887

25. Bytyci I, Bajraktari G, Fabiani I, Lindqvist P, Poniku A, Pugliese NR*, et al.* Left atrial compliance index predicts exercise capacity in patients with heart failure and preserved ejection fraction irrespective of right ventricular dysfunction. *Echocardiography* 2019;**36**,1045-1053. https,//doi.org/10.1111/echo.14377

26. Liu YX, Li H, Xia YY, Xia CL, Qu XL, Chu P*, et al.* Left atrial diameter and atrial fibrillation, but not elevated NT-proBNP, predict the development of pulmonary hypertension in patients with HFpEF. *J Geriatr Cardiol* 2020;**17**,400-409. https,//doi.org/10.11909/j.issn.1671-5411.2020.07.002

27. Trejo-Velasco B, Cruz-González I, Barreiro-Pérez M, Díaz-Peláez E, García-González P, Martín-García A*, et al.* Mean Velocity of the Pulmonary Artery as a Clinically Relevant Prognostic Indicator in Patients with Heart Failure with Preserved Ejection Fraction. *J Clin Med* 2022;**11**,491. https,//doi.org/10.3390/jcm11030491

28. Aschauer S, Zotter-Tufaro C, Duca F, Kammerlander A, Dalos D, Mascherbauer J*, et al.* Modes of death in patients with heart failure and preserved ejection fraction. *Int J Cardiol* 2017;**228**,422-426. https,//doi.org/10.1016/j.ijcard.2016.11.154

29. Nitsche C, Kammerlander AA, Binder C, Duca F, Aschauer S, Koschutnik M*, et al.* Native T1 time of right ventricular insertion points by cardiac magnetic resonance, relation with invasive haemodynamics and outcome in heart failure with preserved ejection fraction. *Eur Heart J Cardiovasc Imaging* 2020;**21**,683-691. https,//doi.org/10.1093/ehjci/jez221

30. Nishihara T, Yamamoto E, Tokitsu T, Sueta D, Fujisue K, Usuku H*, et al.* New Definition of Pulmonary Hypertension in Patients with Heart Failure with Preserved Ejection Fraction. *Am J Respir Crit Care Med* 2019;**200**,386-388. https,//doi.org/10.1164/rccm.201901-0148LE

31. Morris DA, Krisper M, Nakatani S, Köhncke C, Otsuji Y, Belyavskiy E*, et al.* Normal range and usefulness of right ventricular systolic strain to detect subtle right ventricular systolic abnormalities in patients with heart failure, a multicentre study. *Eur Heart J Cardiovasc Imaging* 2017;**18**,212-223. https,//doi.org/10.1093/ehjci/jew011

32. Salamon JN, Kelesidis I, Msaouel P, Mazurek JA, Mannem S, Adzic A*, et al.* Outcomes in World Health Organization group II pulmonary hypertension, mortality and readmission trends with systolic and preserved ejection fraction-induced pulmonary hypertension. *J Card Fail* 2014;**20**,467-475. https,//doi.org/10.1016/j.cardfail.2014.05.003

33. Lam CS, Roger VL, Rodeheffer RJ, Borlaug BA, Enders FT, Redfield MM. Pulmonary hypertension in heart failure with preserved ejection fraction, a community-based study. *J Am Coll Cardiol* 2009;**53**,1119-1126. https,//doi.org/10.1016/j.jacc.2008.11.051

34. Farrero M, Blanco I, Batlle M, Santiago E, Cardona M, Vidal B*, et al.* Pulmonary hypertension is related to peripheral endothelial dysfunction in heart failure with preserved ejection fraction. *Circ Heart Fail* 2014;**7**,791-798. https,//doi.org/10.1161/CIRCHEARTFAILURE.113.000942

35. Nakamura T, Uematsu M, Deyama J, Watanabe Y, Nakamura K, Kobayashi T*, et al.* Pulmonary Vascular Resistance Is Associated With Brachial-Ankle Pulse-Wave Velocity and Adverse Clinical Outcomes in Patients With Heart Failure With Preserved Ejection Fraction. *J Card Fail* 2019;**25**,725-732. https,//doi.org/10.1016/j.cardfail.2019.02.019

36. Bourji KI, Kelemen BW, Mathai SC, Damico RL, Kolb TM, Mercurio V*, et al.* Poor survival in patients with scleroderma and pulmonary hypertension due to heart failure with preserved ejection fraction. *Pulm Circ* 2017;**7**,409-420. https,//doi.org/10.1177/2045893217700438

37. Kanagala P, Arnold JR, Singh A, Khan JN, Gulsin GS, Gupta P*, et al.* Prevalence of right ventricular dysfunction and prognostic significance in heart failure with preserved ejection fraction. *Int J Cardiovasc Imaging* 2021;**37**,255-266. https,//doi.org/10.1007/s10554-020-01953-y

38. Damy T, Kallvikbacka-Bennett A, Goode K, Khaleva O, Lewinter C, Hobkirk J*, et al.* Prevalence of, associations with, and prognostic value of tricuspid annular plane systolic excursion (TAPSE) among out-patients referred for the evaluation of heart failure. *J Card Fail* 2012;**18**,216-225. https,//doi.org/10.1016/j.cardfail.2011.12.003

39. Huang L, Pang L, Gu Q, Yang T, Li W, Quan R*, et al.* Prevalence, risk factors, and survival associated with pulmonary hypertension and heart failure among patients with underlying coronary artery disease, a national prospective, multicenter registry study in China. *Chin Med J (Engl)* 2022;**135**,1837-1845. https,//doi.org/10.1097/CM9.0000000000002112

40. Burke MA, Katz DH, Beussink L, Selvaraj S, Gupta DK, Fox J*, et al.* Prognostic importance of pathophysiologic markers in patients with heart failure and preserved ejection fraction. *Circ Heart Fail* 2014;**7**,288-299. https,//doi.org/10.1161/CIRCHEARTFAILURE.113.000854

41. Cenkerova K, Dubrava J, Pokorna V, Kaluzay J, Jurkovicova O. Prognostic value of echocardiography and ECG in heart failure with preserved ejection fraction. *Bratisl Lek Listy* 2016;**117**,407-412. https,//doi.org/10.4149/bll_2016_080

42. Gargani L, Pugliese NR, Frassi F, Frumento P, Poggianti E, Mazzola M*, et al.* Prognostic value of lung ultrasound in patients hospitalized for heart disease irrespective of symptoms and ejection fraction. *ESC Heart Fail* 2021;**8**,2660-2669. https,//doi.org/10.1002/ehf2.13206

43. Robaeys W, Bektas S, Boyne J, van Empel V, Uszko-Lencer N, Knackstedt C*, et al.* Pulmonary and right ventricular dysfunction are frequently present in heart failure irrespective of left ventricular ejection fraction. *Heart Asia* 2017;**9**,e010914. https,//doi.org/10.1136/heartasia-2017-010914

44. Karakus G, Kammerlander AA, Aschauer S, Marzluf BA, Zotter-Tufaro C, Bachmann A*, et al.* Pulmonary artery to aorta ratio for the detection of pulmonary hypertension, cardiovascular magnetic resonance and invasive hemodynamics in heart failure with preserved ejection fraction. *J Cardiovasc Magn Reson* 2015;**17**,79. https,//doi.org/10.1186/s12968-015-0184-3

45. Nakagawa A, Yasumura Y, Yoshida C, Okumura T, Tateishi J, Yoshida J*, et al.* Prognostic Importance of Right Ventricular-Vascular Uncoupling in Acute Decompensated Heart Failure With Preserved Ejection Fraction. *Circ Cardiovasc Imaging* 2020;**13**,e011430. https,//doi.org/10.1161/CIRCIMAGING.120.011430

46. Baratto C, Caravita S, Dewachter C, Faini A, Perego GB, Bondue A*, et al.* Right Heart Adaptation to Exercise in Pulmonary Hypertension, An Invasive Hemodynamic Study. *J Card Fail* 2023;**29**,1261-1272. https,//doi.org/10.1016/j.cardfail.2023.04.009

47. Gorter TM, van Melle JP, Rienstra M, Borlaug BA, Hummel YM, van Gelder IC*, et al.* Right Heart Dysfunction in Heart Failure With Preserved Ejection Fraction, The Impact of Atrial Fibrillation. *J Card Fail* 2018;**24**,177-185. https,//doi.org/10.1016/j.cardfail.2017.11.005

48. Melenovsky V, Hwang SJ, Lin G, Redfield MM, Borlaug BA. Right heart dysfunction in heart failure with preserved ejection fraction. *Eur Heart J* 2014;**35**,3452-3462. https,//doi.org/10.1093/eurheartj/ehu193

49. van Wezenbeek J, Kianzad A, van de Bovenkamp A, Wessels J, Mouratoglou SA, Braams NJ*, et al.* Right Ventricular and Right Atrial Function Are Less Compromised in Pulmonary Hypertension Secondary to Heart Failure With Preserved Ejection Fraction, A Comparison With Pulmonary Arterial Hypertension With Similar Pressure Overload. *Circ Heart Fail* 2022;**15**,e008726. https,//doi.org/10.1161/CIRCHEARTFAILURE.121.008726

50. Nakagawa A, Yasumura Y, Yoshida C, Okumura T, Tateishi J, Seo M*, et al.* Right Ventricular Dimension for Heart Failure With Preserved Ejection Fraction Involving Right Ventricular-Vascular Uncoupling. *CJC Open* 2022;**4**,929-938. https,//doi.org/10.1016/j.cjco.2022.07.014

51. Mukherjee M, Sharma K, Madrazo JA, Tedford RJ, Russell SD, Hays AG. Right-Sided Cardiac Dysfunction in Heart Failure With Preserved Ejection Fraction and Worsening Renal Function. *Am J Cardiol* 2017;**120**,274-278. https,//doi.org/10.1016/j.amjcard.2017.04.019

52. Deng XL, Yi HW, Xiao J, Zhang XF, Zhao J, Sun M*, et al.* Serum uric acid, A risk factor for right ventricular dysfunction and prognosis in heart failure with preserved ejection fraction. *Front Endocrinol (Lausanne)* 2023;**14**,1143458. https,//doi.org/10.3389/fendo.2023.1143458

53. Aschauer S, Kammerlander AA, Zotter-Tufaro C, Ristl R, Pfaffenberger S, Bachmann A*, et al.* The right heart in heart failure with preserved ejection fraction, insights from cardiac magnetic resonance imaging and invasive haemodynamics. *Eur J Heart Fail* 2016;**18**,71-80. https,//doi.org/10.1002/ejhf.418

54. Lindley KJ, Williams D, Conner SN, Verma A, Cahill AG, Davila-Roman VG. The Spectrum of Pregnancy-Associated Heart Failure Phenotypes, An Echocardiographic Study. *Int J Cardiovasc Imaging* 2020;**36**,1637-1645. https,//doi.org/10.1007/s10554-020-01866-w

55. Bosch L, Lam C, Gong L, Chan SP, Sim D, Yeo D*, et al.* Right ventricular dysfunction in left-sided heart failure with preserved versus reduced ejection fraction. *Eur J Heart Fail* 2017;**19**,1664-1671. https,//doi.org/10.1002/ejhf.873

56. Mohammed SF, Hussain I, AbouEzzeddine OF, Takahama H, Kwon SH, Forfia P*, et al.* Right ventricular function in heart failure with preserved ejection fraction, a community-based study. *Circulation* 2014;**130**,2310-2320. https,//doi.org/10.1161/CIRCULATIONAHA.113.008461

57. Morris DA, Gailani M, Vaz Pérez A, Blaschke F, Dietz R, Haverkamp W*, et al.* Right ventricular myocardial systolic and diastolic dysfunction in heart failure with normal left ventricular ejection fraction. *J Am Soc Echocardiogr* 2011;**24**,886-897. https,//doi.org/10.1016/j.echo.2011.04.005

58. Guazzi M, Bandera F, Pelissero G, Castelvecchio S, Menicanti L, Ghio S*, et al.* Tricuspid annular plane systolic excursion and pulmonary arterial systolic pressure relationship in heart failure, an index of right ventricular contractile function and prognosis. *Am J Physiol Heart Circ Physiol* 2013;**305**,H1373-1381. https,//doi.org/10.1152/ajpheart.00157.2013

59. Hussain I, Mohammed SF, Forfia PR, Lewis GD, Borlaug BA, Gallup DS*, et al.* Impaired Right Ventricular-Pulmonary Arterial Coupling and Effect of Sildenafil in Heart Failure With Preserved Ejection Fraction, An Ancillary Analysis From the Phosphodiesterase-5 Inhibition to Improve Clinical Status And Exercise Capacity in Diastolic Heart Failure (RELAX) Trial. *Circ Heart Fail* 2016;**9**,e002729. https,//doi.org/10.1161/CIRCHEARTFAILURE.115.002729

60. Hassanin Hanboly N, Baghdady YM, El-Kaffas S, Mohamed T. Right ventricular systolic and diastolic function in heart failure with preserved ejection fraction. *Cor Vasa* 2021;**63**,295-303. https,//doi.org/10.33678/cor.2020.022

61. Lejeune S, Roy C, Ciocea V, Slimani A, de Meester C, Amzulescu M*, et al.* Right Ventricular Global Longitudinal Strain and Outcomes in Heart Failure with Preserved Ejection Fraction. *J Am Soc Echocardiogr* 2020;**33**,973-984.e2. https,//doi.org/10.1016/j.echo.2020.02.016

62. Martínez Santos P, Vilacosta I, Batlle López E, Sánchez Sauce B, España Barrio E, Jiménez Valtierra J*, et al.* Surface electrocardiogram detects signs of right ventricular pressure overload among acute-decompensated heart failure with preserved ejection fraction patients. *J Electrocardiol* 2016;**49**,536-538. https,//doi.org/10.1016/j.jelectrocard.2016.02.021

63. Puwanant S, Priester TC, Mookadam F, Bruce CJ, Redfield MM, Chandrasekaran K. Right ventricular function in patients with preserved and reduced ejection fraction heart failure. *Eur J Echocardiogr* 2009;**10**,733-737. https,//doi.org/10.1093/ejechocard/jep052

64. Stein GY, Kremer A, Shochat T, Bental T, Korenfeld R, Abramson E*, et al.* The diversity of heart failure in a hospitalized population, the role of age. *J Card Fail* 2012;**18**,645-653. https,//doi.org/10.1016/j.cardfail.2012.05.007

65. Rifaie O, El-Damanhory H, Amr M, Nammas W. Prevalence and predictors of pulmonary hypertension in elderly patients with isolated diastolic heart failure. *Kardiol Pol* 2010;**68**,655-661

66. Vanhercke D, Pardaens S, Weytjens C, Vande Kerckhove B, De Laet N, Janssens E*, et al.* Prevalence, Determinants, and Prognostic Significance of Pulmonary Hypertension in Elderly Patients Admitted with Acute Decompensated Heart Failure, A Report from the BIO-HF Registry. *Echocardiography* 2015;**32**,1333-1338. https,//doi.org/10.1111/echo.12857

67. Kalogeropoulos AP, Siwamogsatham S, Hayek S, Li S, Deka A, Marti CN*, et al.* Echocardiographic assessment of pulmonary artery systolic pressure and outcomes in ambulatory heart failure patients. *J Am Heart Assoc* 2014;**3**,e000363. https,//doi.org/10.1161/JAHA.113.000363

68. Orozco-Gutiérrez JJ, Castillo-Martínez L, Orea-Tejeda A, Vázquez-Díaz O, Valdespino-Trejo A, Narváez-David R*, et al.* Effect of L-arginine or L-citrulline oral supplementation on blood pressure and right ventricular function in heart failure patients with preserved ejection fraction. *Cardiol J* 2010;**17**,612-618

69. Schwartzenberg S, Redfield MM, From AM, Sorajja P, Nishimura RA, Borlaug BA. Effects of vasodilation in heart failure with preserved or reduced ejection fraction implications of distinct pathophysiologies on response to therapy. *J Am Coll Cardiol* 2012;**59**,442-451. https,//doi.org/10.1016/j.jacc.2011.09.062

70. YN Shi, F Yuan, Y Xu. TAPSE/PASP evaluates the prognosis of elderly patients with heart failurewith preserved ejection fraction. *Journal of Clinical Cardiology (China)* 2024;**40**,134-141. http,//www.chinadoi.cn/10.13201/j.issn.1001-1439.2024.02.010

71. YP Zhu, YY Zhao, SH Su, NY Chen, YP Chen. Correlation between right ventricular dysfunction and diabetes in elderly patients with heart. *Chin J Crit Care* 2020;**40**,1137-1142. http,//www.chinadoi.cn/10.3969/j.issn.1002-1949.2020.12.004

72. CL Gou, YM Lyu, LL Xue, SM Ma, JG Yang, Q Zou*, et al.* Analysis of the Features and Risk Factors of Right Ventricular Dysfunction in Patients With Heart Failure. *Chinese Circulation Journal* 2022;**37**,494-499. http,//www.chinadoi.cn/10.3969/j.issn.1000-3614.2022.05.008

73. CL Gou, YM Lyu, LL Xue, SM Ma, JG Yang, L Yang*, et al.* Pulmonary Arterial Pressure and Right Heart Structural Changes in Heart Failure Patients With Preserved or. *Chinese Circulation Journal* 2020;**35**,1108-1114. http,//www.chinadoi.cn/10. 3969/j. issn. 1000-3614. 2020. 11. 01

# Supplementary Figure Legends

**Figure S7.** Prevalence of RVD in HFpEF by GLS, RVEF, RV dilation.

A: Prevalence of RVD in HFpEF by GLS;

B: Prevalence of RVD in HFpEF by CMR-RVEF;

C: Prevalence of RVD in HFpEF by RV dilation;

Abbreviation: RVD, right ventricular dysfunction; HFpEF, heart failure with preserved ejection fraction; CMR-RVEF, magnetic resonance-derived RV ejection fraction; RV dilation, right ventricular dilation; CI, confidence interval.

**Figure S8.** Prevalence of RVD in HFpEF by a single RVD diagnostic criterion or composite RVD diagnostic criteria.

A: Prevalence of RVD in HFpEF by RVDa;

B: Prevalence of RVD in HFpEF by RVDb;

Note: RVDa, diagnosis by composite criteria (defined as at least two RV systolic function parameters falling)；RVDb, diagnosis based on isolated criteria（defined as one RV systolic function parameters falling or no specific definition was provided for RVD);

Abbreviation: RVD, right ventricular dysfunction; HFpEF, heart failure with preserved ejection fraction; CI, confidence interval.

**Figure S9.** Prevalence of RVD in HFpEF by Tei index and TAPSE/PASP.

A: Prevalence of RVD in HFpEF by Tei index;

B: Prevalence of RVD in HFpEF by TAPSE/PASP;

RVD, right ventricular dysfunction; HFpEF, heart failure with preserved ejection fraction; Tei index, myocardial performance index; TAPSE, tricuspid annular plane systolic excursion; PASP, pulmonary arterial systolic pressure; CI, confidence interval.
